# Supplementary material for: Ralstonia solanacearum Type III Effector RipAY Is a Glutathione-Degrading Enzyme That Is Activated by Plant Cytosolic Thioredoxins and Suppresses Plant Immunity
Source: PubMed Central journal article supplement (PMC4959522; doi:10.1128/mbio.00359-16), 2016-04-12
Supplement: mbo002162778s1.pdf [file mbo002162778s1.pdf]

## Supplemental References

- S1. **Sambrook J, Fritsch EF, Maniatis T.** 1989. Molecular cloning: a laboratory manual, 2nd ed. Cold Spring Harbor Laboratory Press, Cold Spring Harbor, N.Y.
- S2. **Simon R, Prierer U, Pühler A.** 1983. A broad host range mobilization system for *in vivo* genetic engineering: Transposon mutagenesis in Gram-negative bacteria. *Bio/Technology* **1**:784–791.
- S3. **Lamblin F, Saladin G, Dehorter B, Cronier D, Grenier E, Lacoux J, Bruyant P, Lainé E, Chabbert B, Girault F, Monties B, Morvan C, David H, David A.** 2001. Overexpression of a heterologous *sam* gene encoding S-adenosylmethionine synthetase in flax (*Linum usitatissimum*) cells: consequences on methylation of lignin precursors and pectins. *Physiol Plant* **112**:223–232.
