# Supplementary material for: Ralstonia solanacearum Type III Effector RipAY Is a Glutathione-Degrading Enzyme That Is Activated by Plant Cytosolic Thioredoxins and Suppresses Plant Immunity
Source: PubMed Central journal article supplement (PMC4959522; doi:10.1128/mbio.00359-16), 2016-04-12
Supplement: mbo002162778sf2.pdf [file mbo002162778sf2.pdf]

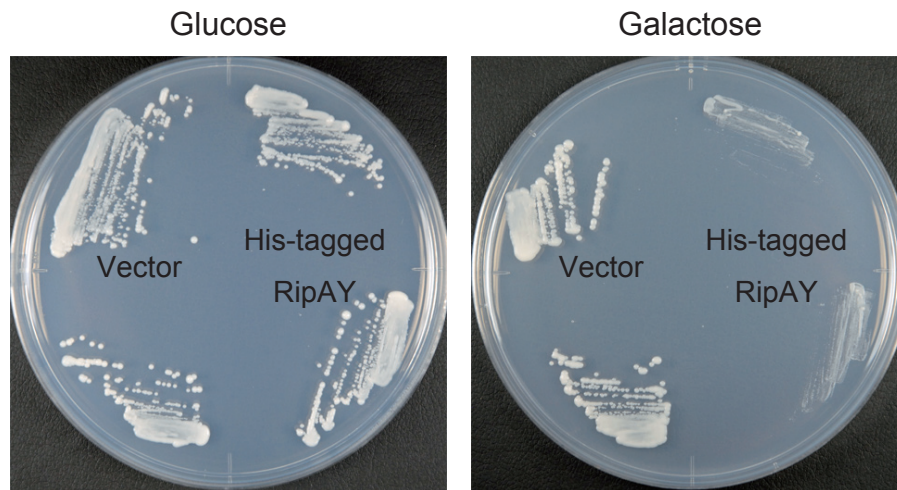

**Fig. S2.** The expression of N-terminal His-tagged RipAY inhibited yeast growth. Yeast strains harboring pYC2/CT and pYC2/CT expressing N-terminal His-tagged RipAY is streaked on the repressing (Glc) and inducing (Gal) media, and incubated at 30 ° C; photographs were taken after 2 and 3 days of incubation, respectively.
