# Supplementary material for: Ralstonia solanacearum Type III Effector RipAY Is a Glutathione-Degrading Enzyme That Is Activated by Plant Cytosolic Thioredoxins and Suppresses Plant Immunity
Source: PubMed Central journal article supplement (PMC4959522; doi:10.1128/mbio.00359-16), 2016-04-12
Supplement: mbo002162778sf3.pdf [file mbo002162778sf3.pdf]

# MASCOT Search Results

User :  
 Email :  
 Search title :  
 MS data file :  
 Database : NUSInr 20141019 (51471198 sequences: 18460256539 residues)  
 Taxonomy : Saccharomyces Cerevisiae (baker's yeast) (50168 sequences)  
 Timestamp :  
 Protein hits :

- [x|16321879](#) Rtc3p [Saccharomyces cerevisiae S288c]
- [x|1322920148](#) Chain A, Crystal Structure Of Oxidized Form From Saccharomyces Cerevisiae
- [x|2131127](#) RPS21A [Saccharomyces cerevisiae]
- [x|6320275](#) Fmp16p [Saccharomyces cerevisiae S288c]
- [x|323308207](#) Mrp17p [Saccharomyces cerevisiae Fosters0]
- [x|323349895](#) Ccr4p [Saccharomyces cerevisiae Lalvin QA23]
- [x|16321935](#) Chs7p [Saccharomyces cerevisiae S288c]

## Mascot Score Histogram

Ions score is  $-10 \cdot \log(P)$ , where P is the probability that the observed match is a random event. Individual ions scores > 28 indicate identity or extensive homology ( $p < 0.05$ ). Protein scores are derived from ions scores as a non-probabilistic basis for ranking protein hits.

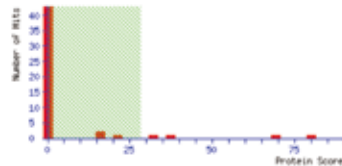

## Peptide Summary Report

Format As: Peptide Summary [Help](#)  
 Significance threshold  $p < 0.05$  Max. number of hits AUTO  
 Standard scoring  MudPIT scoring  Ions score or expect cut-off 0 Show sub-sets 0  
 Show pop-ups  Suppress pop-ups  Sort unassigned Decreasing Score Require bold red   
 Preferred taxonomy All entries

Select All  Select None  Search Selected  Error tolerant

1. [x|16321879](#) Mass: 12002 Score: 80 Matches: 2(2) Sequences: 2(2) eMPAI: 0.62  
 Rtc3p [Saccharomyces cerevisiae S288c]

Check to include this hit in error tolerant search

| Query                                   | Observed | Mr (expt) | Mr (calc) | Delta   | Miss | Score | Expect  | Rank | Unique | Peptide         |
|-----------------------------------------|----------|-----------|-----------|---------|------|-------|---------|------|--------|-----------------|
| <input checked="" type="checkbox"/> 104 | 495.2290 | 988.4434  | 988.4825  | -0.0391 | 0    | 67    | 9.8e-06 | 1    | U      | R.GAEGELGAASK.A |
| <input checked="" type="checkbox"/> 110 | 511.2291 | 1020.4437 | 1020.4876 | -0.0439 | 0    | 32    | 0.028   | 1    | U      | K.AGVENEFGK.G   |

Proteins matching the same set of peptides:

[x|130749784](#) Mass: 14164 Score: 80 Matches: 2(2) Sequences: 2(2)  
 Chain A, Solution Nmr Structure Of Protein Yhr057w From Saccharomyces Cerevisiae, Northeast Structural Genomics Consortium Target Ytyst425

2. [x|1322920148](#) Mass: 12264 Score: 67 Matches: 6(2) Sequences: 3(2) eMPAI: 0.61  
 Chain A, Crystal Structure Of Oxidized Form From Saccharomyces Cerevisiae

Check to include this hit in error tolerant search

| Query                                   | Observed | Mr (expt) | Mr (calc) | Delta   | Miss | Score | Expect | Rank | Unique | Peptide                        |
|-----------------------------------------|----------|-----------|-----------|---------|------|-------|--------|------|--------|--------------------------------|
| <input checked="" type="checkbox"/> 85  | 351.6791 | 701.3437  | 701.3708  | -0.0271 | 0    | 9     | 0.8    | 1    | U      | K.GAIASNV.-                    |
| <input checked="" type="checkbox"/> 97  | 466.7307 | 931.4468  | 931.4871  | -0.0403 | 0    | 38    | 0.012  | 1    | U      | K.WIAPWIEK.F                   |
| <input checked="" type="checkbox"/> 99  | 470.2680 | 938.5214  | 938.5549  | -0.0335 | 0    | 44    | 0.0028 | 1    | U      | R.VYGANPAAIK.Q                 |
| <input checked="" type="checkbox"/> 100 | 474.7274 | 947.4403  | 947.4820  | -0.0416 | 0    | (7)   | 14     | 1    | U      | K.WIAPWIEK.F + Oxidation (M)   |
| <input checked="" type="checkbox"/> 101 | 474.7291 | 947.4436  | 947.4820  | -0.0384 | 0    | (24)  | 0.27   | 1    | U      | K.WIAPWIEK.F + Oxidation (M)   |
| <input checked="" type="checkbox"/> 102 | 482.7255 | 963.4364  | 963.4769  | -0.0405 | 0    | (17)  | 1.1    | 1    | U      | K.WIAPWIEK.F + 2 Oxidation (M) |

Proteins matching the same set of peptides:

[x|1323714537](#) Mass: 11238 Score: 67 Matches: 6(2) Sequences: 3(2)  
 Chain A, Crystal Structure Of Mxr1 From Saccharomyces Cerevisiae In Complex With Trx2  
[x|1349578415](#) Mass: 11341 Score: 67 Matches: 6(2) Sequences: 3(2)  
 K7, Trx2p [Saccharomyces cerevisiae Kyokai no. 7]  
[x|1383875712](#) Mass: 12248 Score: 67 Matches: 6(2) Sequences: 3(2)  
 Chain B, Crystal Structure Of Peroxiredoxin Ahp1 From Saccharomyces Cerevisiae In Complex With Thioredoxin Trx2  
[x|1398366149](#) Mass: 11311 Score: 67 Matches: 6(2) Sequences: 3(2)  
 thioredoxin TRX2 [Saccharomyces cerevisiae S288c]

3. [x|2131127](#) Mass: 8882 Score: 38 Matches: 1(1) Sequences: 1(1) eMPAI: 0.38  
 RPS21A [Saccharomyces cerevisiae]

Check to include this hit in error tolerant search

| Query                                   | Observed | Mr (expt) | Mr (calc) | Delta   | Miss | Score | Expect | Rank | Unique | Peptide      |
|-----------------------------------------|----------|-----------|-----------|---------|------|-------|--------|------|--------|--------------|
| <input checked="" type="checkbox"/> 103 | 486.2563 | 970.5020  | 970.5447  | -0.0427 | 0    | 38    | 0.012  | 1    | U      | R.LAQMGLLK.N |

Proteins matching the same set of peptides:

[x|16322325](#) Mass: 9811 Score: 38 Matches: 1(1) Sequences: 1(1)  
 ribosomal 40S subunit protein S21B [Saccharomyces cerevisiae S288c]  
[x|1256272110](#) Mass: 9910 Score: 38 Matches: 1(1) Sequences: 1(1)  
 Rps21bp [Saccharomyces cerevisiae JAY291]  
[x|1398365233](#) Mass: 9797 Score: 38 Matches: 1(1) Sequences: 1(1)

**Fig. S3.** Mascot search results. Peptides derived from a tryptic digestion of a protein band of interest were separated and analyzed by nanoLC-ESI-Q-TOF mass spectrometry (MS/MS). The collected data were analyzed by database search using the MASCOT program.
