# Supplementary material for: Ralstonia solanacearum Type III Effector RipAY Is a Glutathione-Degrading Enzyme That Is Activated by Plant Cytosolic Thioredoxins and Suppresses Plant Immunity
Source: PubMed Central journal article supplement (PMC4959522; doi:10.1128/mbio.00359-16), 2016-04-12
Supplement: mbo002162778sf4.pdf [file mbo002162778sf4.pdf]

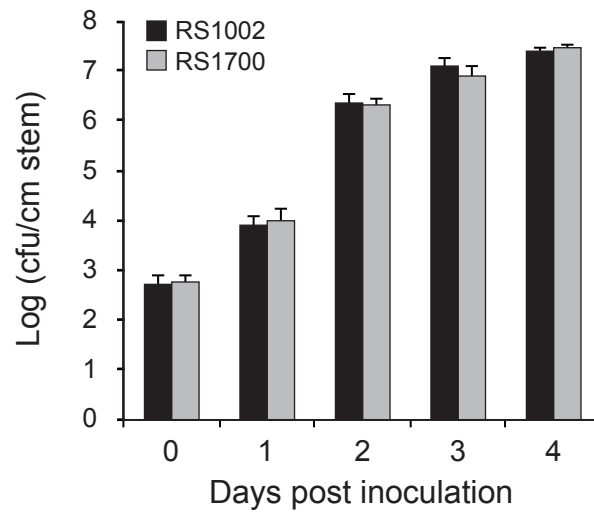

**Fig. S4.** Growth of *R. solanacearum* strains in stem of eggplants. A set of four plants were inoculated with  $5 \times 10^3$  cells of each *R. solanacearum* strain, RS1002 (*ripAY*<sup>+</sup>) and RS1700 ( $\Delta$ *ripAY*), using a stem-cutting method as described previously (19). *R. solanacearum*  $\Delta$ *ripAY* strain RS1700 is constructed by a standard gene disruption procedure using a marker exchange plasmid pK18*mobsacB*. Primer sets used for construction of pK18*mobsacB* carrying the  $\Delta$ *ripAY* construct were listed in Table S2.
