# Supplementary material for: Ralstonia solanacearum Type III Effector RipAY Is a Glutathione-Degrading Enzyme That Is Activated by Plant Cytosolic Thioredoxins and Suppresses Plant Immunity
Source: PubMed Central journal article supplement (PMC4959522; doi:10.1128/mbio.00359-16), 2016-04-12
Supplement: mbo002162778st1.pdf [file mbo002162778st1.pdf]

**TABLE S1** Bacterial and yeast strains

| Strain                           | Relevant genotype                                                                                                                                                                                                                                       | Reference               |
|----------------------------------|---------------------------------------------------------------------------------------------------------------------------------------------------------------------------------------------------------------------------------------------------------|-------------------------|
| <i>Ralstonia solanacearum</i>    |                                                                                                                                                                                                                                                         |                         |
| RS1002                           | RS1000 Na <sup>r</sup> (phyloptype I, biovar 4)                                                                                                                                                                                                         | (19)                    |
| RS1700                           | RS1002 $\Delta ripAY$                                                                                                                                                                                                                                   | This study              |
| RS1701                           | RS1002 $\Delta gshAB::Sm^r/Sp^r$                                                                                                                                                                                                                        | This study              |
| <i>Escherichia coli</i>          |                                                                                                                                                                                                                                                         |                         |
| JM109                            | <i>E. coli</i> K12 <i>recA1 supE44 endA1 hsdR17 gyrA96 relA1</i><br>$\Delta(lac-proAB)$ F' [ <i>traD36 proAB<sup>+</sup> lacI<sup>f</sup> lacZ</i> $\Delta$ M15]                                                                                        | (S1)                    |
| BL21-Gold (DE3)                  | <i>E. coli</i> B F <sup>-</sup> <i>dcm<sup>+</sup> Hte ompT hsdS(r<sub>B</sub>- m<sub>B</sub>-) gal <math>\lambda</math>(DE3) endA Tet<sup>r</sup></i>                                                                                                  | Agilent<br>Technologies |
| S17-1                            | <i>E. coli</i> K12 <i>thi pro hsdR<sup>-</sup> hsdM<sup>+</sup> recA</i><br>[chr::RP4-2-Tc::Mu-Km::Tn7]                                                                                                                                                 | (S2)                    |
| <i>Agrobacterium tumefaciens</i> |                                                                                                                                                                                                                                                         |                         |
| GV3101                           | Gm <sup>r</sup> Rif <sup>r</sup>                                                                                                                                                                                                                        | (S3)                    |
| <i>Saccharomyces cerevisiae</i>  |                                                                                                                                                                                                                                                         |                         |
| YPH499                           | <i>MATa ura3-52 lys2-801 ade2-101 trp1-63 his3-200 leu2-1</i>                                                                                                                                                                                           | (62)                    |
| KDY97.1a                         | <i>MATa his4 HMLa leu2-3, 112 rme1 trp1 ura3-52 <math>\Delta cpr1::LEU2</math></i><br><i><math>\Delta cpr2::TRP1 cpr3::HIS3 \Delta cpr4::URA3 \Delta cpr5::LEU2</math></i><br><i><math>\Delta cpr6::G418 \Delta cpr7::G418 \Delta cpr8::G418</math></i> | (59)                    |
