# Supplementary material for: Ralstonia solanacearum Type III Effector RipAY Is a Glutathione-Degrading Enzyme That Is Activated by Plant Cytosolic Thioredoxins and Suppresses Plant Immunity
Source: PubMed Central journal article supplement (PMC4959522; doi:10.1128/mbio.00359-16), 2016-04-12
Supplement: mbo002162778st2.pdf [file mbo002162778st2.pdf]

**Table S2** Primer sets used in this study<sup>a</sup>

| Target gene                           | Comment for product                                                       | Primer sets | Primer sequence (5'-3')                                               |
|---------------------------------------|---------------------------------------------------------------------------|-------------|-----------------------------------------------------------------------|
| <i>Construction of gene cassettes</i> |                                                                           |             |                                                                       |
| <i>ripAY</i>                          | Native form, for expression in pYC2/CT                                    | P1002       | 5'-GCTCTAGAAATGGAAAGAATCTCGACAAATG-3'                                 |
|                                       |                                                                           | P1003       | 5'-GGACTAGTTCAGTCGGGTTTGGGCTGCGTG-3'                                  |
| <i>ripAY</i>                          | N-terminal His-tagged form, for expression in pET24b                      | P3063       | 5'-GCATATGGGCAGCAGCCATCACCATCATCACCACAGCCAGATGGAAAGAATCTCGACAAATGC-3' |
|                                       |                                                                           | P3037       | 5'-GGACTAGTTCAGTCGGTCCGGATCAAG-3'                                     |
| <i>ripAY</i>                          | N-terminal HA-tagged form, for expression in pEl2Ω-MCS, In-Fusion cloning | P3211       | 5'-ATTCGGTACCACTAGATGTACCCATACGATGTTC-3'                              |
|                                       |                                                                           | P3236       | 5'-ATTCGAGCTCACTAGTCAGTCGGGTTTGGGCTG-3'                               |
| <i>ripAY</i>                          | GFP fusion, for expression in pEl2Ω- <i>gfp</i> , In-Fusion cloning       | P3237       | 5'-ATGGACGAGCTGTACATGGAAAGAATCTCGACA-3'                               |
|                                       |                                                                           | P3238       | 5'-CCGCTTACTTGTACTCAGTCGGGTTTGGGCTGCG-3'                              |
| <i>YER163c</i>                        | Native form, for expression in pYC2/CT                                    | P3042       | 5'-GACTAGTATGACTAATGACAACAGTGGTAT-3'                                  |
|                                       |                                                                           | P3043       | 5'-GACTAGTTCACCTGTATTTATTTACAGTC-3'                                   |
| <i>YER163c</i>                        | N-terminal His-tagged form, for expression in pET24b                      | P3064       | 5'-GCATATGGGCAGCAGCCATCACCATCATCACCACAGCCAGATGACTAATGACAACAGTGGTAT-3' |
|                                       |                                                                           | P3040       | 5'-GGCGGCCCGCCCTGTATTTATTTACAGTCTC-3'                                 |
| <i>RTC3</i>                           | Native form, for expression in pET24b                                     | P3078       | 5'-GGCATATGTCTACTGTAACCAAATACT-3'                                     |
|                                       |                                                                           | P3079       | 5'-GGGAATTCTCAATTGTAGGCTTTGGTTCCG-3'                                  |
| <i>TRX2</i>                           | Native form, for expression in pET24b                                     | P3084       | 5'-GGCATATGGTCACTCAATTAATCCG-3'                                       |
|                                       |                                                                           | P3085       | 5'-GGGAATTCCTATACGTTGGAAGCAATAGCT-3'                                  |
| <i>RsTrxA</i>                         | Native form, for expression in pET24b                                     | P3098       | 5'-GGCATATGAGCGAACAGATCAAGTATG-3'                                     |
|                                       |                                                                           | P3099       | 5'-GGGAATTCCTTAGAGGTGGCTGTCCAGGAAG-3'                                 |
| <i>AtTRX-h1</i>                       | Native form, for expression in pET24b                                     | P3102       | 5'-GGCATATGGCTTCGGAAGAAGGACAAG-3'                                     |
|                                       |                                                                           | P3103       | 5'-GGGAATTCCTAAGCCAAGTGTGGCAATG-3'                                    |
| <i>AtTRX-h2</i>                       | Native form, for expression in pET24b                                     | P3104       | 5'-GGCATATGGGAGGAGCTTTATCAACTG-3'                                     |
|                                       |                                                                           | P3105       | 5'-GGGAATTCCTATGCTCTGAGTTTGCTAACT-3'                                  |
| <i>AtTRX-h3</i>                       | Native form, for expression in pET24b                                     | P3106       | 5'-GGCATATGGCCGCAGAAGGAGAAGTTA-3'                                     |
|                                       |                                                                           | P3107       | 5'-GGGAATTCCTCAAGCAGCAGCAACAACACTGTC-3'                               |
| <i>AtTRX-h4</i>                       | Native form, for expression in pET24b                                     | P3108       | 5'-GGCATATGGCCGCAGAAGAGGGTCAAG-3'                                     |
|                                       |                                                                           | P3109       | 5'-GGGAATTCCTACGCAGTTGTAACACCAGTA-3'                                  |
| <i>AtTRX-h5</i>                       | Native form, for expression in pET24b                                     | P3110       | 5'-GGCATATGGCCGGTGAAGGAGAAGTGA-3'                                     |
|                                       |                                                                           | P3111       | 5'-GGCGGCCCGCTCAAGCAGAAGCTACAAGACC-3'                                 |

|                 |                                          |                |                                                                               |
|-----------------|------------------------------------------|----------------|-------------------------------------------------------------------------------|
| <i>AtTRX-h7</i> | Native form, for expression<br>in pET24b | P3112<br>P3113 | 5'-GGCATATGGGTTCCAATGTTTCATCTG-3'<br>5'-GGGAATTCCTTAAACCCTATGTTGTTCAATC-3'    |
| <i>AtTRX-h8</i> | Native form, for expression<br>in pET24b | P3114<br>P3115 | 5'-GGCATATGGGTGCTAACGTTTCTACTC-3'<br>5'-GGGAATTCCTCAGAAGAAGGATTGTGTGTAT-3'    |
| <i>AtTRX-h9</i> | Native form, for expression<br>in pET24b | P3116<br>P3117 | 5'-GGCATATGGGTAGCTGCGTCTCTAAGG-3'<br>5'-GGGAATTCCTCAAGGCCGTTGAGGACTTTCA-3'    |
| <i>AtTRX-m1</i> | Mature form, for expression<br>in pET24b | P3165<br>P3119 | 5'-GGCATATGGACTGCTACAGGAATTCCAG-3'<br>5'-GGGCGGCCGCTTACAAGAATTTGTTGATGCTG-3'  |
| <i>AtTRX-fl</i> | Mature form, for expression<br>in pET24b | P3166<br>P3121 | 5'-GGCATATGGTTGGTCAGGTGACGGAGGTCG-3'<br>5'-GGGAATTCCTCATCCGGAAGCAGCAGACCTC-3' |
| <i>AtTRX-x</i>  | Mature form, for expression<br>in pET24b | P3167<br>P3133 | 5'-GGCATATGGGCGGAATCAAAGAGATTGGAG-3'<br>5'-GGGCGGCCGCTTAAGCAACAGATATTGAGT-3'  |
| <i>AtTRX-y1</i> | Mature form, for expression<br>in pET24b | P3168<br>P3135 | 5'-GGCATATGGAAGCCAAGAAGCAGACATTTG-3'<br>5'-GGGCGGCCGCTTATGGCTTCACTTTTAGAG-3'  |
| <i>AtTRX-z</i>  | Mature form, for expression<br>in pET24b | P3170<br>P3171 | 5'-GGCATATGGGCAAGTTTGTGAGAGAAGATT-3'<br>5'-GGGAATTCCTCACATCTCGTTGTCAATGATA-3' |
| <i>AtTRX-o1</i> | Mature form, for expression<br>in pET24b | P3169<br>P3137 | 5'-GGCATATGGAAAATGGTGTGTTCTAGTGA-3'<br>5'-GGGCGGCCGCTCACTTGTAGAGCTGTTCCA-3'   |

*Site-directed mutagenesis*

|                 |                           |                |                                                                                  |
|-----------------|---------------------------|----------------|----------------------------------------------------------------------------------|
| <i>ripAY</i>    | RipAY E216Q               | P3044<br>P3045 | 5'-CGTGTCATCCGCCGGCAACTACTGGACGAG-3'<br>5'-CTCGTCCAGTAGTTGCCGGCGGATGACACG-3'     |
| <i>ripAY</i>    | RipAYC328S                | P3124<br>P3125 | 5'-CGCTTTGTGCAATCCAGCGAAACAGCCAAG-3'<br>5'-CTTGGCTGTTTCGCTGGATTTCGACAAAGCG-3'    |
| <i>AtTRX-h3</i> | <i>AtTRX-h3</i> C39S/C42S | P3163<br>P3164 | 5'-TGCAACATGGAGCCCACCTAGCCGTTTCATTG-3'<br>5'-CAATGAAACGGCTAGGTGGGCTCCATGTTGCA-3' |
| <i>AtTRX-h5</i> | <i>AtTRX-h5</i> C39S/C42S | P3149<br>P3150 | 5'-AGCATCATGGTCTCCACCTAGCCGTTTCATTG-3'<br>5'-CAATGAAACGGCTAGGTGGAGACCATGATGCT-3' |

*Construction of R. solanacearum mutants*

|              |                                               |                |                                                                            |
|--------------|-----------------------------------------------|----------------|----------------------------------------------------------------------------|
| <i>gshAB</i> | for introducing<br>$\Delta gshAB::Sm^r/Spc^r$ | P3065<br>P3067 | 5'-GGGGATCCTCGCCAACAAGGTGGCCGATG-3'<br>5'-GGGGATCCCGCTCGGACAGCAGTTGCGCC-3' |
| <i>ripAY</i> | for introducing $\Delta ripAY$<br>upstream    | P3032<br>P3033 | 5'-GGGAATTCGGGCCGCCATGCGG-3'<br>5'-GGGGATCCGGCTGGCACCGTTCGATCGGGA-3'       |
| <i>ripAY</i> | for introducing $\Delta ripAY$<br>downstream  | P3034<br>P3035 | 5'-GGGGATCCCGCCACTCGCCATTCTCTCGC-3'<br>5'-GGAAGCTTAGCCGATGCCGATAATGTCC-3'  |

*Quantitative real time PCR*

|                  |             |                                    |
|------------------|-------------|------------------------------------|
| <i>NbACRE132</i> | NbACRE132   | 5'- CAAACGGCGGCACAAGAC -3'         |
|                  | -qRT-FW     |                                    |
|                  | NbACRE132   | 5'- GATAACCGCCAGCGAAATTG -3'       |
|                  | -qRT-RV     |                                    |
| <i>NbEF1α</i>    | NbEF1α-qRT  | 5'- CCTCAAGAAGGTTGGATACAAC -3'     |
|                  | -FW         |                                    |
|                  | NbEF1α-qRT  | 5'- TCTTGGGCTCATTAATCTGGTC -3'     |
|                  | -RV         |                                    |
| <i>NbPti5</i>    | NbPti5-qRT- | 5'- CCTCCAAGTTTGAGCTCGGATAGT -3'   |
|                  | FW          |                                    |
|                  | NbPti5-qRT- | 5'- CCAAGAAATTCTCCATGCACTCTGTC -3' |
|                  | RV          |                                    |
| <i>NbWRKY22</i>  | NbWrky22    | 5'- CAAGGCATAAAGCAGACACAACA -3'    |
|                  | -qRT-FW     |                                    |
|                  | NbWrky22    | 5'- GCTTCTGACCACCGCATGT -3'        |
|                  | -qRT-RV     |                                    |

---

<sup>a</sup> The restriction sites used for cloning are underlined.
